# Supplementary material for: Seasonality and trend prediction of scarlet fever incidence in mainland China from 2004 to 2018 using a hybrid SARIMA-NARX model
Source: PeerJ. 2019 Jan 17;7:e6165. doi: 10.7717/peerj.6165 (PMC6339779; doi:10.7717/peerj.6165)
Supplement: File S1 [file peerj-07-6165-s001.xlsx]

## Sheet: Sheet1
Supplementary file 1 Time series of monthly scarlet fever notified cases in mainland China from January 2004 to July 2018
Data	sequence	months	incidence cases
01-2004	1	1	387
02-2004	2	2	588
03-2004	3	3	1229
04-2004	4	4	2131
05-2004	5	5	2352
06-2004	6	6	2464
07-2004	7	7	1469
08-2004	8	8	805
09-2004	9	9	964
10-2004	10	10	1339
11-2004	11	11	2643
12-2004	12	12	2989
01-2005	13	1	2205
02-2005	14	2	761
03-2005	15	3	1545
04-2005	16	4	2853
05-2005	17	5	3274
06-2005	18	6	3540
07-2005	19	7	1757
08-2005	20	8	1048
09-2005	21	9	1165
10-2005	22	10	1694
11-2005	23	11	2784
12-2005	24	12	3087
01-2006	25	1	1629
02-2006	26	2	848
03-2006	27	3	1768
04-2006	28	4	2783
05-2006	29	5	3163
06-2006	30	6	3550
07-2006	31	7	1911
08-2006	32	8	1009
09-2006	33	9	1328
10-2006	34	10	2165
11-2006	35	11	3692
12-2006	36	12	4326
01-2007	37	1	3052
02-2007	38	2	1255
03-2007	39	3	1792
04-2007	40	4	3269
05-2007	41	5	4538
06-2007	42	6	5153
07-2007	43	7	2632
08-2007	44	8	1232
09-2007	45	9	1482
10-2007	46	10	2239
11-2007	47	11	3360
12-2007	48	12	4166
01-2008	49	1	2563
02-2008	50	2	961
03-2008	51	3	2198
04-2008	52	4	3036
05-2008	53	5	4874
06-2008	54	6	3740
07-2008	55	7	1783
08-2008	56	8	914
09-2008	57	9	1156
10-2008	58	10	1713
11-2008	59	11	2431
12-2008	60	12	3138
01-2009	61	1	1440
02-2009	62	2	834
03-2009	63	3	1859
04-2009	64	4	3059
05-2009	65	5	3500
06-2009	66	6	3712
07-2009	67	7	2013
08-2009	68	8	1096
09-2009	69	9	1262
10-2009	70	10	1318
11-2009	71	11	1065
12-2009	72	12	1283
01-2010	73	1	925
02-2010	74	2	473
03-2010	75	3	853
04-2010	76	4	1352
05-2010	77	5	2269
06-2010	78	6	2397
07-2010	79	7	1526
08-2010	80	8	958
09-2010	81	9	1169
10-2010	82	10	1541
11-2010	83	11	3217
12-2010	84	12	4094
01-2011	85	1	3143
02-2011	86	2	1000
03-2011	87	3	2795
04-2011	88	4	5023
05-2011	89	5	9308
06-2011	90	6	9773
07-2011	91	7	5173
08-2011	92	8	2174
09-2011	93	9	2813
10-2011	94	10	4972
11-2011	95	11	8488
12-2011	96	12	9696
01-2012	97	1	4460
02-2012	98	2	2268
03-2012	99	3	3339
04-2012	100	4	4443
05-2012	101	5	7210
06-2012	102	6	6794
07-2012	103	7	3416
08-2012	104	8	1418
09-2012	105	9	1792
10-2012	106	10	2804
11-2012	107	11	4420
12-2012	108	12	5066
01-2013	109	1	3316
02-2013	110	2	1037
03-2013	111	3	2090
04-2013	112	4	3073
05-2013	113	5	4600
06-2013	114	6	4226
07-2013	115	7	2389
08-2013	116	8	1168
09-2013	117	9	1465
10-2013	118	10	2150
11-2013	119	11	3659
12-2013	120	12	5346
01-2014	121	1	3513
02-2014	122	2	1230
03-2014	123	3	2890
04-2014	124	4	4338
05-2014	125	5	7113
06-2014	126	6	7557
07-2014	127	7	3873
08-2014	128	8	1827
09-2014	129	9	2424
10-2014	130	10	4118
11-2014	131	11	7043
12-2014	132	12	8615
01-2015	133	1	6859
02-2015	134	2	2858
03-2015	135	3	3788
04-2015	136	4	5968
05-2015	137	5	9130
06-2015	138	6	9992
07-2015	139	7	5176
08-2015	140	8	2156
09-2015	141	9	2854
10-2015	142	10	4256
11-2015	143	11	6883
12-2015	144	12	8878
01-2016	145	1	6152
02-2016	146	2	2074
03-2016	147	3	3931
04-2016	148	4	4955
05-2016	149	5	7980
06-2016	150	6	8190
07-2016	151	7	4256
08-2016	152	8	1930
09-2016	153	9	2624
10-2016	154	10	3781
11-2016	155	11	6097
12-2016	156	12	7611
01-2017	157	1	4633
02-2017	158	2	2335
03-2017	159	3	4718
04-2017	160	4	6804
05-2017	161	5	11388
06-2017	162	6	11129
07-2017	163	7	5298
08-2017	164	8	2379
09-2017	165	9	3006
10-2017	166	10	4279
11-2017	167	11	7947
12-2017	168	12	10622
01-2018	169	1	7564
02-2018	170	2	2159
03-2018	171	3	3774
04-2018	172	4	6784
05-2018	173	5	10747
06-2018	174	6	10716
07-2018	175	7	5385

## Sheet: Sheet2
Data	incidence	SARIMA model	NAR model	ARIMA-NAR model	ARIMA-NARX model
01-2018	7564	7039	7350.11	7417.53	6311.98
02-2018	2159	2998	2954.8	2533.27	2189.32
03-2018	3774	5816	4354.56	5604.23	4087.89
04-2018	6784	8759	5128.73	7809.55	5601.81
05-2018	10747	13938	7357.83	14287.7	12515.5
06-2018	10716	14393	6884.37	14854.2	13387.4
07-2018	5385	7584	3670.33	7392.65	5474.02

## Sheet: Sheet3
Time	Observations
2004	18939
2005	25068
2006	27620
2007	33488
2008	27782
2009	22068
2010	20876
2011	63878
2012	46459
2013	34207
2014	54247
2015	68249
2016	59282
2017	74369

## Sheet: Sheet4
Months	Seasonal factor
January	0.96375
February	0.38383
March	0.74207
April	1.1438
May	1.67394
June	1.68842
July	0.87339
August	0.41958
September	0.52429
October	0.77489
November	1.27463
December	1.53741
